# Supplementary material for: Lactoferrin modulates gut microbiota and Toll-like receptors (TLRs) in mice with dysbiosis induced by antibiotics
Source: Royal Society of Chemistry journal article supplement (doi:10.1039/d2fo00287f), 2022-01-01
Supplement: d2fo00287f1.pdf [file d2fo00287f1.pdf]

**Electronic Supplementary Material (ESI) for Food & Function.**  
**This journal is © The Royal Society of Chemistry 2022**

## SUPPLEMENTARY INFORMATION

### **Lactoferrin modulates gut microbiota and Toll-like receptors (TLRs) in mice with dysbiosis induced by antibiotics**

Andrea Bellés,<sup>a,c</sup> Diego Aguirre-Ramírez,<sup>a</sup> Inés Abad,<sup>b,c</sup> Marcos Parras,<sup>e,f,g</sup> Lourdes Sánchez<sup>b,c</sup> and Laura Grasa<sup>\*a,c,d</sup>

<sup>a</sup> *Universidad de Zaragoza. Facultad de Veterinaria. Departamento de Farmacología, Fisiología y Medicina Legal y Forense. Zaragoza, Spain. E-mail: lgralo@unizar.es*

<sup>b</sup> *Universidad de Zaragoza. Facultad de Veterinaria. Departamento de Producción Animal y Tecnología de los Alimentos. Zaragoza, Spain.*

<sup>c</sup> *Instituto Agroalimentario de Aragón IA2 (UNIZAR-CITA), Zaragoza, Spain.*

<sup>d</sup> *Instituto de Investigación Sanitaria de Aragón (IIS Aragón). Zaragoza, Spain*

<sup>e</sup> *Department of Mathematical Sciences. Chalmers University of Technology and University of Gothenburg. Gothenburg, Sweden.*

<sup>f</sup> *Centre for Antibiotic Resistance Research (CARE), University of Gothenburg. Gothenburg, Sweden.*

<sup>g</sup> *Igenomix Foundation/INCLIVA Biomedical Research Institute.*

\*Corresponding author

Dr. Laura Grasa            e-mail: [lgralo@unizar.es](mailto:lgralo@unizar.es)

Facultad de Veterinaria. Universidad de Zaragoza. C/ Miguel Servet, 177. 50013 Zaragoza, Spain.



### 3.2. Bacterial composition

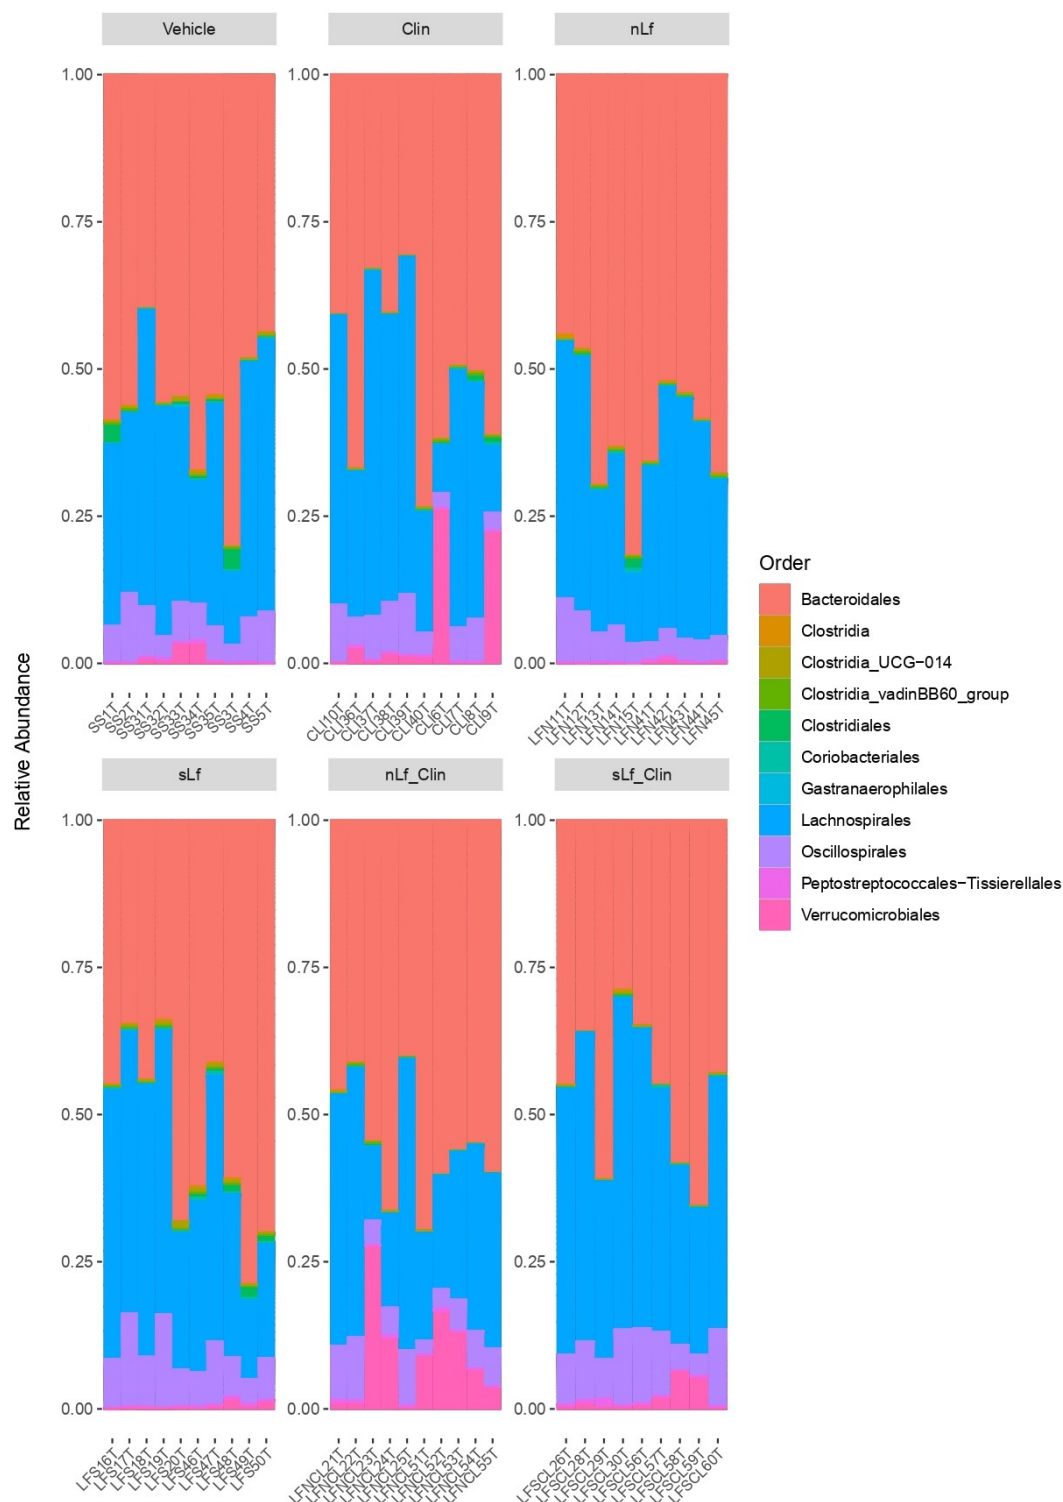

**Figura S2.** Bacterial relative abundances at order level in each sample of vehicle (Control, labeled with SS ), clin (labeled with CLI ), nLf (labeled with LFN), sLf ( labeled with LFS), nLf\_Clin (labeled with LFNCL) and sLf\_Clin (labeled with LFSCl) groups.

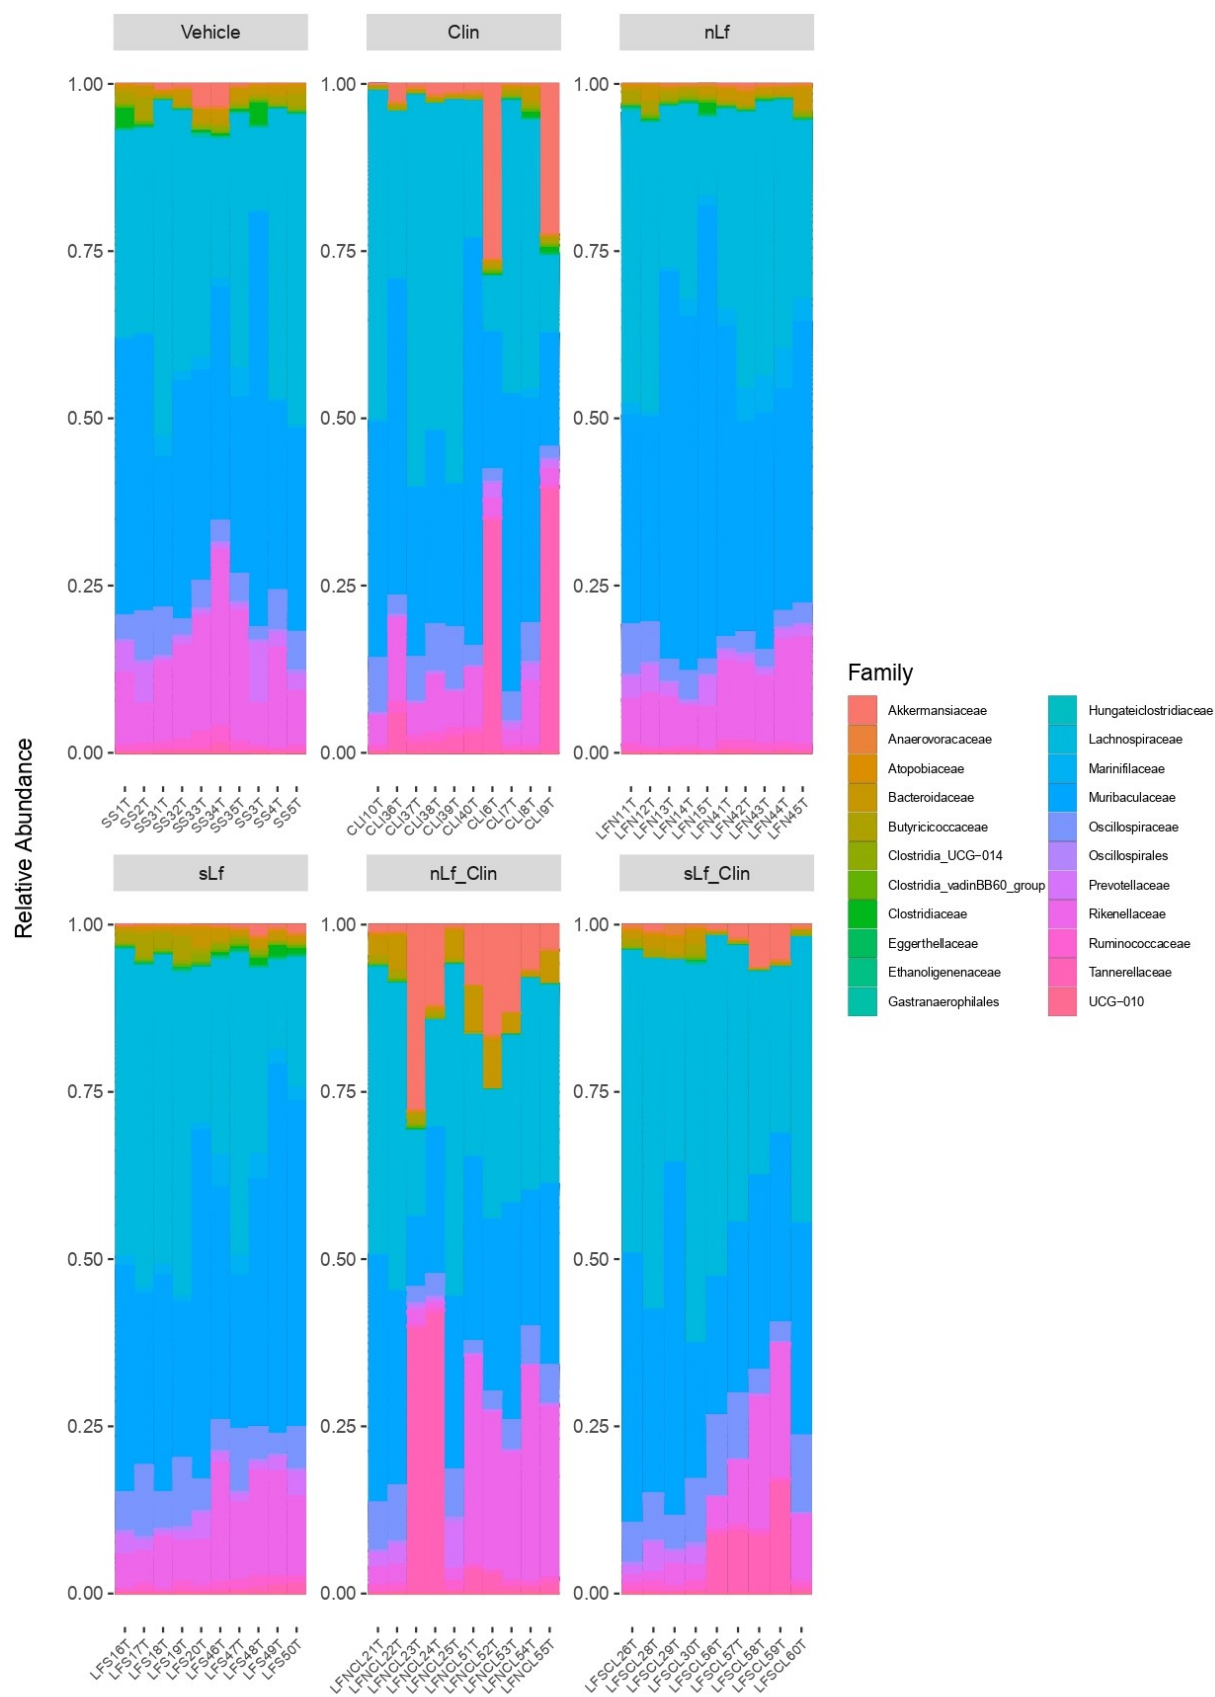

**Figure S3.** Bacterial relative abundances at family level in each sample of vehicle (Control, labeled with SS ), clin (labeled with CLI ), nLf (labeled with LFN), sLf ( labeled with LFS), nLf\_Clin (labeled with LFNCL) and sLf\_Clin (labeled with LFSCL) groups.

### 3.3. Alpha and Beta diversity

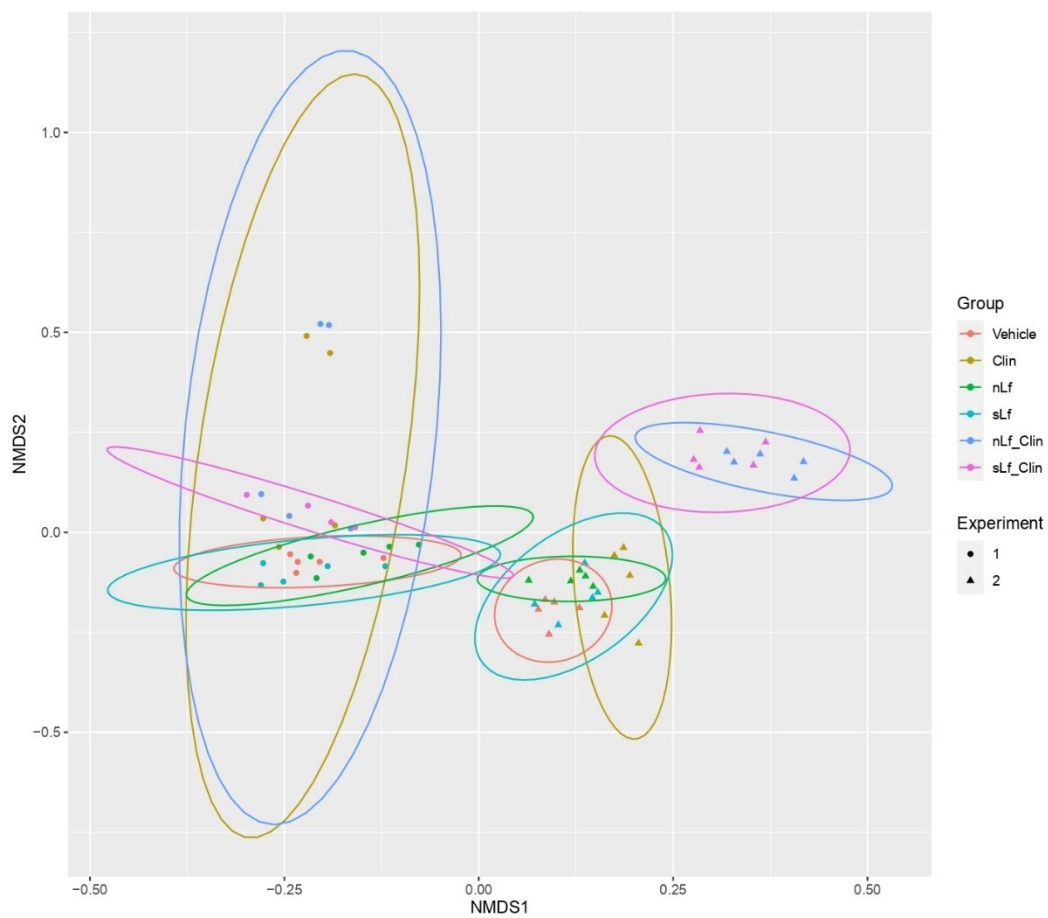

**Figure S4.** NMDS showing the Bray-Curtis distances between the different microbial populations of the groups Vehicle (Control), Clin, nLf, sLf, nLf\_Clin and sLf\_Clin in Experiment 1 and Experiment 2.



### 3.7. Histopathological analysis

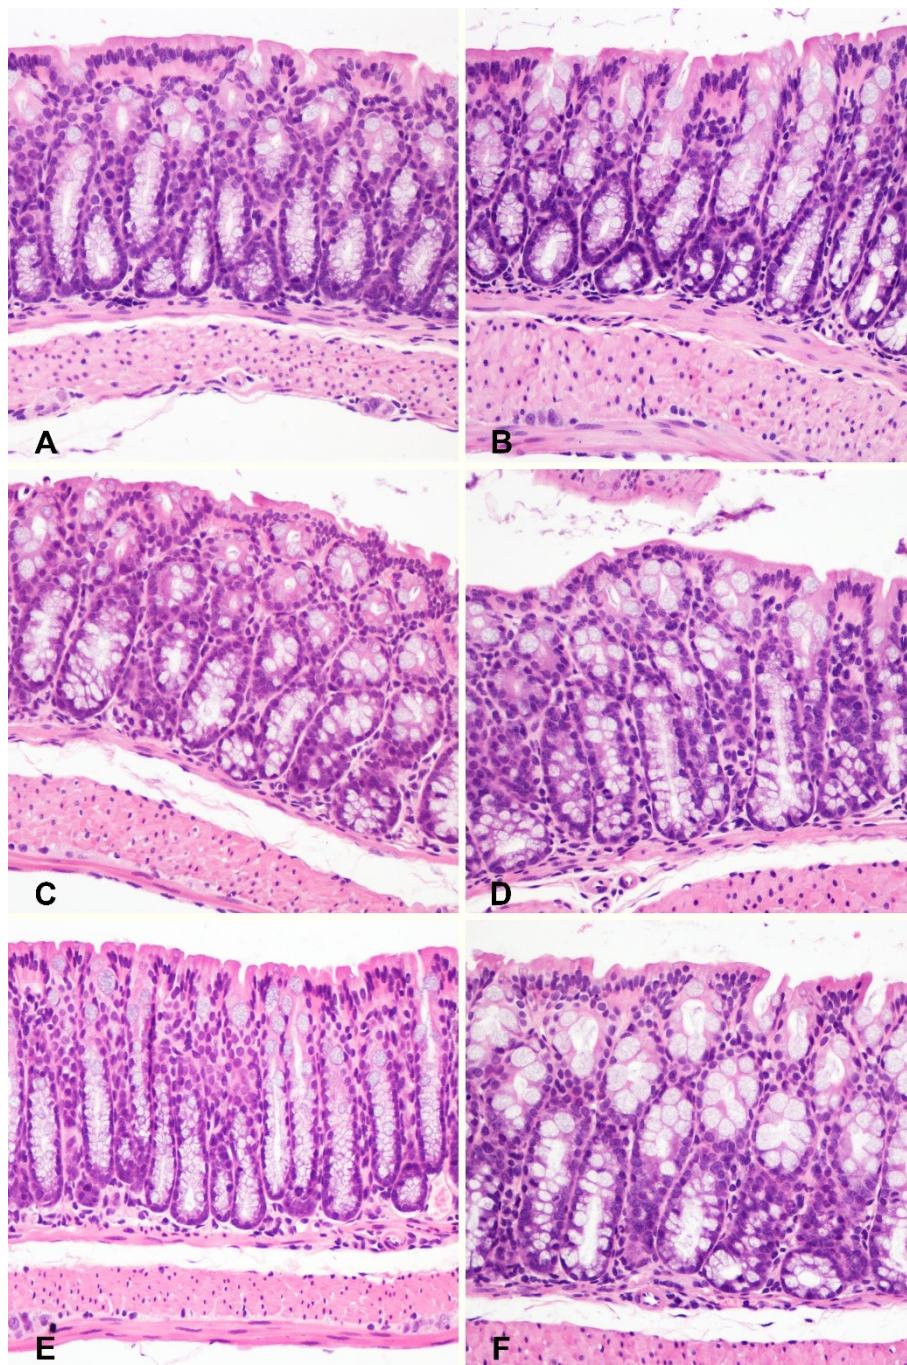

**Figure S5.** Histopathological images of colon sections corresponding to mice from the six experimental groups. A: Vehicle (Control), B: Clin, C: nLf, D: sLf, E: nLf\_Clin, F: sLf\_Clin. Representative sections from six different animals. Hematoxylin eosin stain, 400x.
